1 **Do forest over- and understory respond to the same environmental variables when viewed at the**  
2 **taxonomic and trait level?**

3

4 Kenny Helsen<sup>1</sup>, Yeng-Chen Shen<sup>1</sup>, Tsung-Yi Lin<sup>1</sup>, Chien-Fan Chen<sup>1,2</sup>, Chu-Mei Huang<sup>3</sup>,  
5 Ching-Feng Li<sup>4†</sup> & David Zelený<sup>1</sup>

6

7 <sup>1</sup>Institute of Ecology and Evolutionary Biology, National Taiwan University, Taipei, Taiwan

8 <sup>2</sup>Division of Botanical Garden, Taiwan Forestry Research Institute, Taipei, Taiwan

9 <sup>3</sup>Division of Silviculture, Taiwan Forestry Research Institute, Taipei, Taiwan

10 <sup>4</sup>School of Forestry and Resource Conservation, National Taiwan University, Taipei, Taiwan

11 † Deceased 29 November 2019

12

13 Contact author: Kenny Helsen

14 Corresponding author: David Zelený

15

16 Running head: filtering of forest over- and understory

17 **Abstract**

18 While the relative importance of climate filtering is known to be higher for woody species  
19 assemblages than herbaceous assemblage, it remains largely unexplored whether this pattern  
20 is also reflected between the woody overstory and herbaceous understory of forests. While  
21 climatic variation will be more buffered by the tree layer, the understory might also respond  
22 more to small-scale soil variation, next to experiencing additional environmental filtering due  
23 to the overstory's effects on light and litter quality. For (sub)tropical forests, the understory  
24 often contains a high proportion of fern and lycophyte species, for which environmental  
25 filtering is even less well understood. We explored the proportional importance of climate  
26 proxies and soil variation on the species, functional trait and (functional) diversity patterns of  
27 both the forest overstory and fern and lycophyte understory along an elevational gradient  
28 from 850 to 2100 m a.s.l. in northern Taiwan. We selected nine functional traits expected to  
29 respond to soil nutrient or climatic stress for this study and furthermore verified whether they  
30 were positively related across vegetation layers, as expected when driven by similar  
31 environmental drivers. We found that climate was a proportionally more important predictor  
32 than soil for the species composition of both vegetation layers and trait composition of the  
33 understory. The stronger than expected proportional effect of climate for the understory was  
34 likely due to fern and lycophytes' higher vulnerability to drought, while the high importance  
35 of soil for the overstory seemed driven by deciduous species. The environmental drivers  
36 affected different response traits in both vegetation layers, however, which together with  
37 additional overstory effects on understory traits, resulted in a strong disconnection of  
38 community-level trait values across layers. Interestingly, species and functional diversity  
39 patterns could be almost exclusively explained by climate effects for both vegetational layers,  
40 with the exception of understory species richness. This study illustrates that environmental  
41 filtering can differentially affect species, trait and diversity patterns and can be highly

42 divergent for forest overstory and understory vegetation, and should consequently not be  
43 extrapolated across vegetation layers or between composition and diversity patterns.

44

#### 45 **Key words**

46 Trait-environment relationship, ferns, lycophytes, forest overstory, forest understory,  
47 functional traits, functional diversity, species richness, subtropical montane cloud forest

48

#### 49 **Introduction**

50 Although the effects of environmental or abiotic filtering on plant communities is often  
51 reflected in their species composition and richness, it is believed that this filtering mainly acts  
52 on the plants' functional traits, rather than directly on the species' identities (Lavorel and  
53 Garnier 2002, Kraft et al. 2015). Many studies have consequently observed strong trait –  
54 environment relationships across ecosystems (Wright et al. 2005, Ordoñez et al. 2009,  
55 Bruelheide et al. 2018). Not only functional trait composition, but also functional diversity  
56 can be affected by environmental filtering (Aros-Mualin et al. 2021). Functional diversity is,  
57 more specifically, expected to be reduced under environmentally stressful conditions, since  
58 only a limited number of functionally similar species will be able to establish (cf. trait  
59 underdispersion) (Weiher and Keddy 1995). The spatial extent at which environmental  
60 filtering occurs furthermore seems to differ among different environmental factors (Mokany  
61 and Roxburgh 2010, Bruelheide et al. 2018). While climatic factors mainly drive differences  
62 in species and trait composition across relatively large spatial scales, at smaller spatial scales,  
63 community (trait) composition is mainly structured by local-scale factors, such as variation in  
64 soil conditions (Bruelheide et al. 2018).

65 A recent study focusing on large-scale trait-environment patterns, suggested that the  
66 relative importance of different drivers even differs between woody and herbaceous species

67 assemblages, with climatic variation more strongly impacting woody plant communities  
68 (Šímová et al. 2018). Consequently, within multi-layered forest ecosystems, environmental  
69 filtering might also differentially affect the woody overstory and herbaceous understory. For  
70 example, climate or (micro)climatic-related topography might more strongly impact the  
71 overstory, because the overstory is fully exposed to climatic variation, while the understory  
72 experiences buffered climatic variation under the protection of the forest canopy (Šímová et  
73 al. 2018, De Frenne et al. 2019). The species composition of the overstory might also be more  
74 likely to be filtered by more coarse-scale soil variation compared to that of the herbaceous  
75 understory, whose roots will be much more localized. The understory might additionally  
76 experience filtering due to small-scale environmental variation caused directly by variation in  
77 the overstory. Several studies have, for example, shown the impact of overstory related light  
78 availability and leaf litter on understory species composition (Komiya et al. 2001, Wang et  
79 al. 2019, Majasalmi and Rautiainen 2020), trait composition (Maes et al. 2020) and  
80 functional diversity (Chabrierie et al. 2010).

81 Surprisingly little studies have, however, tried to quantify the similarities in  
82 environmental filtering between the over- and understory layers of forests (however see  
83 Ruokolainen et al. 2007, Rogers et al. 2008, Salazar et al. 2012). While this comparison is  
84 complicated for many temperate forest types, due to the often limited overstory species  
85 diversity, (sub)tropical forests offer an ideal study system to explore these relationships. In  
86 this study we focus on the proportional impact of several climate proxies (topography and  
87 ground fog frequency) and soil variation on the over- and the understory of the subtropical  
88 montane forests of northern Taiwan, along an elevation gradient ranging from 870 to 2130 m  
89 a.s.l.

90 Interestingly, the understory of subtropical montane forests contains a high diversity  
91 of fern and lycophyte species, next to angiosperms. For this reason, we focus specifically on

92 the understory fern and lycophyte species in this study, while excluding angiosperms. Some  
93 studies have observed similar leaf trait-trait (Karst and Lechowicz 2007, Lin et al. 2020) and  
94 trait-environment relationships (Kessler et al. 2007, Kluge and Kessler 2007, Zhu et al. 2016,  
95 Campany et al. 2019) for ferns as for angiosperms, suggesting that functional patterns are  
96 similarly structured and thus comparable across both phylogenetic groups. Environmental  
97 filtering and trait-environment relationships nevertheless remain less well understood for fern  
98 and lycophyte communities, compared to angiosperm communities (Kessler et al. 2016).  
99 Effects of environmental filtering on understory fern community functional diversity has, for  
100 example, been observed in a few studies (Tanaka and Sato 2015, Zhang et al. 2017, Sessa et  
101 al. 2018), but not in others (Kluge and Kessler 2011, Aros-Mualin et al. 2021).

102 To allow optimal trait comparisons across both vegetation layers, we measured the  
103 same nine functional leaf traits for both overstory woody species and understory fern and  
104 lycophyte species. These nine traits were specifically chosen for their expected link to soil  
105 nutrient and/or climatic stress. Using this dataset, we addressed the following research  
106 questions:

- 107 - Do climate proxies and soil factors explain equal proportions of variation in the over- and  
108 understory community-level species and functional trait composition along the elevation  
109 gradient?
- 110 - Are these potential climate proxy and soil filtering processes also reflected in species and  
111 functional diversity along the elevation gradient?
- 112 - Can we find additional filtering of the understory species and trait composition due to  
113 variation in the overstory?

114

115 **Methods**

116 Study design

117 The study was performed in the Wulai district, New Taipei City, northern Taiwan, along an  
118 elevational transect ranging from Mt. Meilu (870 m a.s.l., 24.85°N 121.53°E) to Mt. Taman  
119 (2130 m a.s.l., 24.71°N 121.45°E, Fig. 1). The geological substrates mainly consist of  
120 argillite, shale, slate, sandstone and phyllite (Central Geological Survey, MOEA), with soils  
121 of low pH and high soil organic matter content. The study region is characterized by a humid  
122 subtropical climate ('Cfa' climate sensu the Köppen-Geiger system), with an average annual  
123 temperature of 16.1°C and average annual precipitation of 2070 mm (Lalashan weather  
124 station, 1374 m a.s.l., 24.68°N 121.40°E). Most precipitation falls during the summer,  
125 although the region is also affected by the north-eastern winter monsoon. The forest  
126 vegetation along the gradient varies from lower elevation *Pyrenaria-Machilus* subtropical  
127 winter monsoon forest, across mid-elevation *Quercus montane* evergreen broad-leaved cloud  
128 forest to higher elevation *Chamaecyparis montane* mixed cloud forest (Li et al. 2013).

129 Along the transect, six elevation zones were delimited at 850, 1100, 1350, 1600, 1850  
130 and 2100 m a.s.l.  $\pm$  50 m (Fig. 1). At each elevation zone, ten 10 m  $\times$  10 m plots were  
131 established across a secondary gradient in aspect and topography, ranging from the northeast  
132 facing (windward) to the southwest facing slope (leeward) across the ridge. Plots were  
133 positioned at least 50 m apart. Due to logistic constraints, only 9 plots were established at the  
134 1850 m elevation zone, resulting in a total of 59 plots. For each plot, we recorded the  
135 presence of all woody species (angiosperm and gymnosperm shrubs and trees) taller than 2 m  
136 and with diameter in breast height (DBH)  $\geq$  1 cm (i.e. the 'overstory' vegetation). We also  
137 recorded the presence of all terrestrial (non-epiphytic) fern and lycophyte species, which  
138 together make up 66% of the plot-level herbaceous understory species richness in our study  
139 (i.e. the 'understory' vegetation).

140

141 *Climate proxies*

142 We measured two topographic variables (i.e. elevation and heat load) that are known to relate  
143 to (micro)climatic conditions. The exact elevation of each plot was measured using GPS  
144 (GPSMAP 64st, Garmin, USA). To calculate heat load, we first measured the slope of each  
145 plot with a clinometer (SUUNTO PM-5/360 PC Clinometer, SUUNTO, Finland) from the  
146 upper plot edge, and the aspect of each plot with a compass (SILVA, Sweden). Aspect was  
147 then transformed into folded aspect, which was defined as the azimuth angle difference  
148 between the aspect and 45° (McCune and Keon 2002). We calculated heat load based on  
149 folded aspect and slope using equation 2 of McCune and Keon (2002). We additionally  
150 extracted average annual ground fog frequency for each plot from the ground fog frequency  
151 raster map for Taiwan (250 m per pixel resolution), developed by Schulz et al. (2017), based  
152 on MODIS satellite data. Ground fog frequency is expected to be an important environmental  
153 factor impacting cloud forest vegetation through effects on temperature, light availability,  
154 evapotranspiration and water availability (Fahey et al. 2016).

155

156 *Soil variables*

157 For each plot, four soil samples of the top 0-10 cm were collected and pooled together for soil  
158 analysis. Each pooled soil sample was analyzed for pH, carbon:nitrogen ratio, total nitrogen,  
159 and phosphorous, potassium, magnesium, zinc, calcium, manganese, copper and iron content.  
160 See Appendix S1 for details of the soil chemical analysis.

161 To prevent collinearity among soil predictor variables, we performed a principal  
162 component analysis (PCA) on all measured soil chemical variables (after logarithmic  
163 transformation of Ca, C:N ratio, Mg, Mn, P and Zn and subsequent standardization to zero  
164 mean and unit standard deviation for all variables, Appendix S2). The three retained soil PC

165 axes together explained 81.4% of the total variation. The first axis (termed ‘soil NPK’ in the  
166 text) reflected a gradient in nitrogen, phosphorous and potassium, next to several other  
167 micronutrients. The second axis (‘soil pH’) reflected an increase in pH and soil manganese,  
168 while the third axis (‘soil Cu’) was most strongly related to soil copper (positively) and  
169 calcium and iron (negatively) (Appendix S2).

170 We additionally measured soil depth at four positions in each plot using a 30 cm long  
171 soil depth meter (diameter 0.6 cm) and averaged values per plot. Soil more than 30 cm deep  
172 was recorded as 35 cm (16.9 % of the plots). Soil rockiness (the percentage content of rocks  
173 in the top 0-10 cm of the soil) was also estimated.

174

#### 175 Functional traits

176 Nine leaf traits were measured for 91 overstory woody species (sampled during 10/2014 and  
177 12/2016-09/2018) and 48 understory fern and lycophyte species (sampled during 5/2017-  
178 10/2018), including all common species present in the plots and covering 74.0% and 63.2%  
179 of our over- and understory species pools, respectively (Appendix S3). The nine measured  
180 traits consisted of specific leaf area (SLA, mm<sup>2</sup>/mg), leaf dry matter content (LDMC, mg/g),  
181 area-based leaf chlorophyll content (SPAD units), leaf nitrogen content (leaf N, mg/g), leaf  
182 area (cm<sup>2</sup>), leaf thickness (Lth, mm), equivalent water thickness (EWT, mg/mm<sup>2</sup>), leaf  
183 <sup>13</sup>C/<sup>12</sup>C stable isotope ratio ( $\delta^{13}\text{C}$ , ‰) and leaf <sup>15</sup>N/<sup>14</sup>N stable isotope ratio ( $\delta^{15}\text{N}$ , ‰). Note  
184 that the first four traits are related to the leaf economics spectrum (LES) (cf. Wilson et al.  
185 1999, Wright et al. 2004). Trait measurements largely followed standard protocols (Pérez-  
186 Harguindeguy et al. 2013), with some modifications for fern and lycophyte species. See  
187 Appendix S1 for trait measurement details.

188 These traits are expected to vary along climatic and soil variation gradients, because  
189 of their expected links to either soil nutrient stress (LES traits,  $\delta^{15}\text{N}$ , Lth; Wright and Cannon



190 2001, Hodgson et al. 2011), temperature or climatic stress (LES traits, leaf area; Wright et al.  
191 2005, Dong et al. 2020) or drought (leaf area, Lth, EWT,  $\delta^{13}\text{C}$ ; Medeiros et al. 2019,  
192 Maréchaux et al. 2020). While high values of  $\delta^{13}\text{C}$  are known to reflect high long-term water-  
193 use efficiency, and thus drought tolerance (Farquhar et al. 1982, Pérez-Harguindeguy et al.  
194 2013),  $\delta^{15}\text{N}$  relates to a plant's nitrogen acquisition strategy (Craine et al. 2015). More  
195 specifically,  $\delta^{15}\text{N}$  values around 0 ‰ usually indicate nitrogen fixation, while values around -  
196 2, -3 and -6 ‰ indicate plant nitrogen acquisition through arbuscular, ericoid and  
197 ectomycorrhiza, respectively (Craine et al. 2015). Note that EWT expresses the water mass  
198 content of a fresh leaf per unit leaf area, and is sometimes also called 'succulence'  
199 (Mantovani 1999, Féret et al. 2019).

200 All leaf level trait values were averaged at the species level after exclusion of leaf-  
201 level outliers (Z-score > 2.5 at the species level), as we assumed these values to most likely  
202 occur from measurement errors. This resulted in the exclusion of 0.61 % and 0.16 % of the  
203 trait values from the full leaf  $\times$  trait matrix for the over- and understory, respectively. For leaf  
204 area we did not remove 'outliers', since all trait values could be verified for measurement  
205 errors. Missing trait values for nine overstory species were replaced by mean trait values  
206 across all overstory species, prior to further data analysis.

207

### 208 Data analysis

209 We calculated the plot-level community mean (CM) values for each trait, as the  
210 average trait across all species present in the plot. Since only presence-absence data was  
211 collected, CM trait values were not weighted by species abundance. Species richness was  
212 calculated as the number of species present in the plot. We calculated two measures of  
213 functional diversity for each plot. Scheiner et al. (2017) has recently proposed to express  
214 functional diversity by the two parameters trait dispersion (M') and trait 'evenness' or

215 equability ( ${}^1E(T)$ ), next to species richness. While  $M'$  quantifies ‘magnitude’, i.e. the amount  
216 of difference in trait values among species in a community,  ${}^1E(T)$  quantifies ‘variability’, i.e.  
217 the extent to which species are equally different from each other in trait values. Both  
218 measures are based on pairwise trait dissimilarities. Unlike the more traditionally used  
219 functional diversity parameters (i.e. functional richness, evenness and divergence),  $M'$  and  
220  ${}^1E(T)$  are independent from species richness and evenness, and thus solely reflect trait  
221 magnitude and variability, respectively (Scheiner 2019, Kosman et al. 2021).  $M'$  and  ${}^1E(T)$   
222 were calculated with the R script provided by Malavasi et al. (2018), based on the formulas of  
223 Scheiner et al. (2017), using Gower dissimilarity on the species  $\times$  trait matrix (with traits  
224 standardized to Z-scores) to construct the trait dissimilarity matrix. Leaf area was  
225 logarithmically transformed prior to CM and functional diversity calculation. CM  $\delta^{15}N$  was  
226 additionally transformed using the equation  $(x + 4)^2$  for the overstory dataset and  $\log(x + 2.5)$   
227 for the understory dataset to obtain symmetrical distribution.

228         Before statistical analysis, we calculated variance inflation factors (VIF) to identify  
229 potential collinearity issues, separately among the different climate proxies and among soil  
230 variables. Collinearity was identified for folded aspect and heat load ( $VIF > 5$ ), and thus we  
231 excluded folded aspect from all statistical models. We consequently retained three climate  
232 proxies (elevation, heat load and ground fog frequency) and five soil variables (soil depth,  
233 soil rockiness and three soil PC axes, namely soil NPK, soil pH and soil Cu). Heat load was  
234 squared and soil rockiness was square root transformed prior to statistical analyses to  
235 improve symmetrical distribution of their values.

236         To test the effects of climate proxies and soil variables on the over- and understory  
237 species composition, we performed separate redundancy analyses (RDA) on the respective  
238 plot  $\times$  species matrices. These RDA models were repeated on the plot  $\times$  species matrices  
239 including only species for which traits were measured. Similar RDA models were performed

240 for the over- and understory plot  $\times$  CM trait matrices, with CM of traits standardized to Z-  
241 scores (CWM-RDA, Nygaard and Ejrnæs 2004). The overstory trait RDA model was also  
242 repeated after excluding all deciduous species, to assess the potential effect of deciduous  
243 species on the trait patterns.

244 After assuring global significance of each of the global RDA models containing all  
245 environmental predictors, we performed variation partitioning on each model to assess the  
246 proportions of variation in each plot  $\times$  species or plot  $\times$  CM trait matrix explained by either  
247 climate proxies or soil variables, expressed by adjusted  $R^2$ . Next, we performed forward  
248 model selection among all environmental predictors, based on adjusted  $R^2$ -values  
249 (conditional effects) and their significance assessed using Monte Carlo permutation tests  
250 (9999 permutations). This model selection allowed us to assess which environmental  
251 variables were most important predictors for each species and CM trait dataset. We are aware  
252 that the CWM-RDA method is prone to inflated Type I error rate when using the standard  
253 Monte Carlo permutation test (Šmilauer and Lepš 2014, Zelený 2018). Since there is no  
254 published solution to this problem, however, we nonetheless use these tests. Before forward  
255 model selection, we again used VIFs to ensure that no collinearity occurred among any of the  
256 combined climate and soil variables. All multivariate analyses were performed with the  
257 ‘vegan’ R package (Oksanen et al. 2017).

258 We additionally performed partial redundancy analysis for the understory plot  $\times$   
259 species and plot  $\times$  CM trait datasets, to assess the potential additional effects of the overstory.  
260 To achieve these models, we first performed two PCA’s, one on the overstory plot  $\times$  species  
261 matrix and one on the overstory plot  $\times$  CM trait matrix. For both models, we only retained  
262 PCA axes for which the eigenvalue was larger than the average inertia (Kaiser-Guttman  
263 criterion, Ibanez 1973). Hence, we retained 15 and 3 axes for the overstory species and CM  
264 trait PCA’s, respectively. Next, we performed a partial RDA (pRDA) on the understory plot

265 × species matrix with all retained overstory species PCA axes as explanatory variables, while  
266 partialling out the effects of all measured environmental variables, and assessed the model's  
267 overall significance. Similarly, we assessed the effect (including overall significance) of the  
268 retained overstory trait PCA axes on the understory plot × trait matrix while partialling out all  
269 climate proxies and soil variables.

270 The effects of climate proxies and soil variables on species and functional diversity  
271 were assessed using generalized linear models. For species richness (a count variable) we  
272 used a Poisson probability distribution and log link function. For  $M'$  and  ${}^1E(T)$  we used a  
273 gamma probability distribution with inverse link function, since these variables consist of  
274 positive, continuous, right skewed data. Due to the nonlinear relationship between elevation  
275 and understory species richness, and fog frequency and overstory  ${}^1E(T)$ , we included the  
276 quadratic term for elevation and fog frequency to the respective models. We performed  
277 variation partitioning on the full diversity models to quantify the proportion of explained  
278 deviance by climate proxies and soil variables. Each full model was then reduced using a  
279 AIC-based comparison of all predictor-subset combinations of the full model, using the  
280 'dredge' function in the 'MuMIn' R package (Barton 2019). Model assumptions were  
281 checked using the 'DHARMA' R package (Hartig 2021).

282 If traits and diversity are shaped by similar environmental drivers for the under- and  
283 overstory along our gradient, we expect them to be positively correlated between vegetation  
284 layers. To verify this, we performed simple linear regressions between each understory CM  
285 trait (response) and overstory CM trait (predictor). Based on the scatterplots for these  
286 regressions, we also included a quadratic term for the CM SLA model (i.e. understory CM  
287  $SLA \sim \text{overstory CM SLA} + (\text{overstory CM SLA})^2$ ). These regressions were also performed  
288 for overstory CM traits excluding deciduous species. Similar regressions were additionally  
289 constructed for  $S$ ,  $M'$  and  ${}^1E(T)$  between under- and overstory. All p-values of the pairwise

290 regressions were corrected for type-I error inflation using the false discovery rate method  
291 (Benjamini and Hochberg 1995) with the ‘p.adjust’ function in the ‘stats’ R package. All  
292 analyses were performed with R version 4.0.5.

293

## 294 **Results**

295 Species composition of both over- and understory species was significantly affected by  
296 climate proxy and soil variation, together explaining 29.9% and 30.7% of the total variation  
297 (i.e. adjusted  $R^2$ ), respectively (Fig. 2A&B). Variation partitioning indicated that for both  
298 over- and understory species composition, climate proxies explained a higher relative  
299 proportion of this variation (overstory: 80.4%, understory: 85.0%) than soil (overstory:  
300 54.9%, understory: 54.2%). However, for both vegetation layers, around one third of the  
301 explained variation was shared by climate proxies and soil (Fig. 2A&B). The final RDA  
302 models after forward model selection retained all climate proxy variables and soil pH for both  
303 the overstory and understory species composition. For the overstory species composition, soil  
304 NPK and soil Cu were additionally retained (Table 1, Fig. 3A&B). RDA and variation  
305 partitioning results were barely affected when RDA was performed on the plot  $\times$  species  
306 matrices including only species for which traits were measured (Appendices S4 & S5). The  
307 pRDA indicated that an additional 7.1% ( $p < 0.001$ ) of the total variation in understory  
308 species composition was explained purely by overstory species composition.

309 CM trait composition variation was also related to climate proxies and soil for both  
310 over- (adjusted  $R^2 = 49.3\%$ ) and understory species (adjusted  $R^2 = 42.2\%$ ) (Fig. 2C&D).  
311 Variation partitioning showed that climate proxies were the most important predictors of CM  
312 trait variation for understory species (77.4% of the total explained variation for climate  
313 proxies vs. 58.5% for soil), while soil explained most variation for overstory CM traits  
314 (58.4% for climate proxies vs. 80.5% for soil). For both vegetation layers’ trait composition,

315 around one third of the explained variation was shared by climate proxies and soil (Fig.  
316 2C&D). After forward model selection, elevation, ground fog frequency, soil pH and soil Cu  
317 were retained for both CM trait RDAs, while soil NPK was additionally retained for the  
318 overstory CM trait RDA (Fig. 3C&D). The RDA results were largely similar for overstory  
319 traits excluding deciduous species. However, climate proxies became more important than  
320 soil after variance partitioning (Appendices S4 & S5).

321 The results of the CM trait RDAs furthermore suggest an increase in CM LDMC with  
322 elevation for both vegetation layers and a decrease in CM of leaf area and  $\delta^{15}\text{N}$  with elevation  
323 for the overstory. High ground fog frequency seems to result in lower CM EWT for both  
324 vegetation layers, while high soil pH seems to result in high CM of SLA and leaf N and low  
325 CM Lth for the overstory, and high CM leaf N for the understory (Fig. 3C&D). Note that  
326 these patterns can be inferred from Fig. 3 because the involved environmental variables and  
327 traits were well represented by the first two RDA axes (high axis loadings). Evaluation of the  
328 third RDA axis loadings for the understory furthermore suggests that high soil pH is also  
329 related to high CM leaf N for the understory (results not shown). The pRDA showed that the  
330 overstory trait composition could explain an additional 4.5% ( $p = 0.011$ ) of the variation in  
331 the understory trait composition after partialling out the effects of climate proxies and soil  
332 variables.

333 CM of LDMC and leaf N were positively related, while CM of Lth and  $\delta^{15}\text{N}$  were  
334 negatively related between both vegetation layers. CM SLA showed a parabolic relationship,  
335 with the highest values for the understory at intermediate values for the overstory species.  
336 CM of leaf area, chlorophyll content,  $\delta^{13}\text{C}$  and EWT, on the other hand, were not  
337 significantly related between both vegetation layers (Fig. 4, Appendix S6). Excluding  
338 deciduous species for the overstory weakened, but did not change the direction of all trait -

339 trait relationships, except for leaf thickness, for which the negative relationship strengthened  
340 (Appendices S6 & S7).

341 Compared to soil, climate proxy variables explained more of the variation in species  
342 richness, functional divergence and functional equability for both vegetation layers (Table 1,  
343 Appendix S8). Soil variation nonetheless contributed a small additional proportion to the total  
344 explained variation (< 20%) in the understory species richness and functional equability for  
345 both vegetation layers (Table 1, Appendix S8). While elevation was the strongest climate  
346 proxy predictor for all diversity measures of both the over- and understory, the direction of  
347 these relationship differed between both vegetation layers. While overstory species richness  
348 declined with elevation, understory species richness was highest at intermediate elevation  
349 (Fig. 5A). Functional dispersion increased with elevation for both vegetation layers (Fig. 5C),  
350 while functional equability increased with elevation for the overstory, and decreased for the  
351 understory (Fig. 5E). Soil pH was the strongest soil predictor for understory species richness  
352 (positive relationship) (Fig. 5B) and functional equability (negative relationship) (Fig. 5F).

353 Species richness and functional equability were not significantly related for both  
354 vegetation layers, while functional dispersion was significantly positively related between the  
355 over- and understory (Appendices S6 & S9).

356

## 357 **Discussion**

### 358 **Species and trait composition**

359 Climate proxies were more strongly related than soil to the species composition of the  
360 overstory. This result was expected, since, unlike the understory, the overstory is fully  
361 exposed to climatic variation (Šímová et al. 2018, De Frenne et al. 2019). Surprisingly,  
362 however, also the species and trait composition of the fern and lycophyte understory were  
363 mainly shaped by climate proxies. This nonetheless agrees with the literature, where climate

364 often strongly impacts fern trait composition (e.g. Kessler et al. 2007, Kluge and Kessler  
365 2007, Sessa and Givnish 2014). It has been suggested that the limited potential for controlling  
366 evaporation makes ferns more sensitive to drought than angiosperms (Brodribb and Holbrook  
367 2004, Zhang et al. 2014). This could thus explain why elevation (temperature) and ground  
368 fog frequency (relative humidity) rather than soil variation were the main drivers of fern  
369 species and trait composition in our study.

370         The high relative importance of elevation is not surprising, considering the quite steep  
371 elevational gradient of 1260 m in our dataset. The trait responses followed expectations of  
372 more resource conservative (e.g. high LMDC) and smaller leaves with increasing elevation  
373 for both vegetation layers (Wright et al. 2005, Dong et al. 2020). The high ground fog  
374 frequency likely increased water availability, as suggested by drought-related trait states  
375 (high EWT for both vegetation layers and Lth for understory) in low fog plots in our study (cf.  
376 Medeiros et al. 2019, Maréchaux et al. 2020). Frequent fog can, however, additionally reduce  
377 light availability (up to 10-50%) and local temperature (up to 3-6°C) (Lai et al. 2006,  
378 Reinhardt and Smith 2008) and negatively impact photosynthesis by preventing leaf  
379 transpiration and promoting the growth of epiphyllous lichens and algae. While these  
380 conditions are highly suitable for fern species, which often seem adapted to low light and  
381 high water availability (Sessa and Givnish 2014, Hernández-Rojas et al. 2020), they likely  
382 present less suitable growing conditions for most tree species by hampering photosynthesis  
383 (Fahey et al. 2016). These potential different responses of both vegetation layers were,  
384 however, not reflected in their respective trait composition. More detailed future work using  
385 field-based fog or relative humidity measurements should be used to further explore these  
386 potential effects.

387         Soil did nevertheless still impact the species and trait composition of both vegetation  
388 layers and was, unexpectedly, more important than climate proxies in structuring overstory



389 trait composition. The higher importance of soil for overstory traits compared to species  
390 composition was not due to differences in the species included in both models, since the  
391 species RDA model including only species for which traits were measured gave similar  
392 results. The ‘soil pH’ ordination axis was the most important soil driver, and likely better  
393 reflects plant nutrient availability than soil NPK in the typically highly acidic soils with low  
394 decomposition rates and high soil organic matter of cloud forests (Fahey et al. 2016). The  
395 high nutrient levels following standard soil analysis of these soils likely reflect nutrients  
396 trapped in undecomposed organic matter, rather than plant available nutrients. This could  
397 explain the presence of acquisitive leaf traits (high SLA and leaf N) in less acidic soils for  
398 both vegetation layers (Wright and Cannon 2001). The lower relative importance of soil  
399 variables compared to climate proxies for the understory, on the other hand, might be because  
400 understory fern species respond to more small-scale soil variation than that measured at the  
401 plot-level in this study.

402         Interestingly, if deciduous species are excluded from the overstory, climate proxies  
403 become the most important driver of overstory trait composition, due to reduced importance  
404 of soil pH. Deciduous woody species are more common on steep wind-exposed slopes in  
405 northern Taiwan, probably because of their ability to avoid environmental stress during  
406 winter by shedding their leaves. These steep slopes usually have higher soil pH in  
407 comparison with less steep or flat ridges at the same elevation, perhaps due to surface erosion  
408 removing more acidic soil and litter and increasing availability of more cation-rich weathered  
409 parental rock material. This contradiction between seemingly stress-adapted niches and more  
410 acquisitive LES traits (cf. low leaf longevity, Wright et al. 2004) of deciduous species, makes  
411 it difficult to assess if these soil pH patterns are caused by LES nutrient-availability or wind-  
412 exposure and slope. This shows how soil, topography and climate can interact in their impact

413 on species- and trait composition, as also illustrated by the high overlap in explained  
414 variation by climate proxies and soil for all variation partitioning analyses.

415 We found that the overstory can act as an additional filter on the understory's species  
416 and trait composition, through potential light availability or leaf litter effects, as observed in  
417 previous studies (Komiyama et al. 2001, Wang et al. 2019, Maes et al. 2020, Majasalmi and  
418 Rautiainen 2020). The observational nature of our study does, however, not allow us to assess  
419 the causality of this effect. Alternatively, the relationship between overstory and understory  
420 could be caused by unmeasured environmental conditions affecting species and trait  
421 composition of both layers simultaneously.

422 Despite some similarities in the environmental responses of both vegetation layers,  
423 only two of the nine measured traits showed a significant positive relationship between over-  
424 and understory. This illustrates that environmental filtering differs substantially for trees and  
425 ferns and is most clearly illustrated by Lth. For ferns, Lth seemed to respond to drought (cf.  
426 Kluge and Kessler 2007), but was linked to low nutrient availability in trees (cf. Read et al.  
427 2006), resulting in a negative correlation between both. Direct impact of the overstory on the  
428 understory could also have shaped unexpected trait relationships. The negative correlation for  
429  $\delta^{15}\text{N}$  might, for example, reflect niche differentiation among vegetation layers to prevent  
430 competition for different nitrogen sources. The quadratic relationship for SLA could also be  
431 due to overstory impact on the understory. While nutrient availability mainly structured SLA  
432 for the overstory, for the understory, SLA might be affected by a combination of nutrient  
433 limitation under low overstory SLA (cf. Kessler et al. 2007) and more strong light  
434 competition due to shading under high overstory SLA.

435

436 **Species and functional diversity**

437 Species richness was most strongly affected by elevation for both vegetation layers. Both the  
438 decrease in overstory species richness and humped-shaped relationship for understory fern  
439 species along elevation are consistent with previous studies in (sub)tropical forests (Kluge  
440 and Kessler 2011, Qian and Ricklefs 2016, Hernández-Rojas et al. 2020). At lower elevation,  
441 lower water availability is expected to reduce diversity of drought-sensitive lifeforms such as  
442 ferns and lycophytes (Kessler et al. 2011, Weigand et al. 2020). At higher elevations, on the  
443 other hand, species richness of both ferns and angiosperms will be reduced by the stronger  
444 climatic stress associated with lower temperatures (Kessler et al. 2011). Interestingly, soil  
445 explained a much higher proportion of variation in understory than overstory species richness,  
446 thus showing the opposite pattern as observed for species and trait composition. The impact  
447 of soil productivity (soil pH), next to climate on fern species richness is nonetheless in  
448 agreement with previous work (Tuomisto et al. 2014, Weigand et al. 2020). Not surprisingly,  
449 species richness was not correlated between the two vegetation layers, further illustrating that  
450 species richness is shaped by different environmental drivers for overstory trees and  
451 understory ferns and lycophytes.

452 Functional diversity patterns suggested that for the overstory, the community trait  
453 composition is not experiencing increased trait convergence among species with elevation, as  
454 expected under increased environmental filtering (Weiher and Keddy 1995). On the contrary,  
455 species trait overlap seems to be reduced, resulting in higher average trait distances among  
456 species ( $M'$ ), combined with high equal spacing of species in the trait space ( ${}^1E(T)$ ), a pattern  
457 usually attributed to increased importance of competition among species (Kraft et al. 2008).  
458 Functional equability was nonetheless highest at intermediate ground fog frequency levels,  
459 potentially reflecting trait clustering (environmental filtering) due to drought stress and high  
460 air humidity at each respective end of the ground fog frequency gradient.

461 For the understory, trait composition seemingly clustered in separate distinct trait sets,  
462 potentially reflecting (environmental) filtering of a few alternative trait combinations for  
463 ferns at high elevation (increasing  $M'$ , decreasing  ${}^1E(T)$ ). A similar pattern was also observed  
464 for terrestrial fern communities along four tropical elevation gradients (Aros-Mualin et al.  
465 2021). Elevation related most strongly to functional dispersion in both vegetation layers and  
466 functional equability for the overstory. This again mirrors the results of Aros-Mualin et al.  
467 (2021), who found that temperature was the most important predictor of fern functional  
468 diversity. Functional equability of the understory, on the other hand, was almost equally  
469 strongly affected by soil variation and climate proxies. This soil (pH)-driven environmental  
470 trait filtering for the fern understory (cf. Zhang et al. 2017, Sessa et al. 2018), but not the  
471 overstory, thus mirrors the impact of soil on the species richness patterns in our study.

472

### 473 **Conclusions**

474 Both climate proxies and soil were important predictors of species and trait composition of  
475 both vegetation layers. The stronger effects of climate proxies for understory ferns and  
476 lycophytes compared to overstory trees is likely due to their higher vulnerability to drought.  
477 The environmental drivers furthermore seem to affect very different response traits in both  
478 vegetation layers, which together with additional overstory effects on understory traits,  
479 results in a disconnection of community-level trait values across layers. Interestingly, the  
480 relative importance of soil and climate proxies on species or trait composition cannot be  
481 extrapolated to species or trait diversity, which showed very different patterns. This study  
482 illustrates that environmental filtering can differentially affect species, trait and diversity  
483 patterns and can be highly divergent for forest overstory and understory vegetation.

484

485 **Acknowledgements**

486 We would like to thank to all volunteers who contributed to the field work and lab trait  
487 measurements. Hsin-Yen Teng and Kun-Sung Wu helped with the logistics of the field work,  
488 specimen determination and dataset preparation. This study was supported by Ministry of  
489 Science and Technology, Taiwan (106-2621-B-002-003-MY3 and 109-2811-B-002-644).

490

491 **Literature cited**

- 492 Aros-Mualin, D., S. Noben, D. N. Karger, C. I. Carvajal-Hernández, L. Salazar, A.  
493 Hernández-Rojas, J. Kluge, M. A. Sundue, M. Lehnert, D. Quandt, and M. Kessler.  
494 2021. Functional diversity in ferns is driven by species richness rather than by  
495 environmental constraints. *Frontiers in Plant Science* 11:615723.
- 496 Barton, K. 2019. MuMIn: Multi-Model Inference. R package version 1.43.6.  
497 <https://CRAN.R-project.org/package=MuMIn>.
- 498 Benjamini, Y., and Y. Hochberg. 1995. Controlling the false discovery rate: a practical and  
499 powerful approach to multiple testing. *Journal of the Royal Statistical Society. Series B*  
500 57:289–300.
- 501 Brodribb, T. J., and N. M. Holbrook. 2004. Stomatal protection against hydraulic failure: a  
502 comparison of coexisting ferns and angiosperms. *New Phytologist* 162:663–670.
- 503 Bruelheide, H., J. Dengler, O. Purschke, J. Lenoir, B. Jiménez-Alfaro, S. M. Hennekens, Z.  
504 Botta-Dukát, M. Chytrý, R. Field, et al. 2018. Global trait–environment relationships of  
505 plant communities. *Nature Ecology and Evolution* 2:1906–1917.
- 506 Company, C. E., L. Martin, and J. E. Watkins Jr. 2019. Convergence of ecophysiological  
507 traits drives floristic composition of early lineage vascular plants in a tropical forest  
508 floor. *Annals of Botany* 123:793–803.

- 509 Chabrierie, O., J. Loinard, S. Perrin, R. Saguez, and G. Decocq. 2010. Impact of *Prunus*  
510 *serotina* invasion on understory functional diversity in a European temperate forest.  
511 *Biological Invasions* 12:1891–1907.
- 512 Craine, J. M., E. N. J. Brookshire, M. D. Cramer, N. J. Hasselquist, K. Koba, E. Marin-  
513 Spiotta, and L. Wang. 2015. Ecological interpretations of nitrogen isotope ratios of  
514 terrestrial plants and soils. *Plant and Soil* 396:1–26.
- 515 Dong, N., I. C. Prentice, I. J. Wright, B. J. Evans, H. F. Togashi, S. Caddy-retalic, F. A.  
516 Mcinerney, B. Sparrow, E. Leitch, and A. J. Lowe. 2020. Components of leaf-trait  
517 variation along environmental gradients. *New Phytologist* 228:82–94.
- 518 Fahey, T. J., R. E. Sherman, and E. V. J. Tanner. 2016. Tropical montane cloud forest:  
519 environmental drivers of vegetation structure and ecosystem function. *Journal of*  
520 *Tropical Ecology* 32:355–367.
- 521 Farquhar, G. D., M. H. O’Leary, and J. A. Berry. 1982. On the relationship between carbon  
522 isotope discrimination and the intercellular carbon dioxide concentration in leaves.  
523 *Australian Journal of Plant Physiology* 9:121–137.
- 524 Féret, J.-B., G. le Maire, S. Jay, D. Berveiller, R. Bendoula, G. Hmimina, A. Cheraiet, J. C.  
525 Oliveira, F. J. Ponzoni, et al. 2019. Estimating leaf mass per area and equivalent water  
526 thickness based on leaf optical properties: Potential and limitations of physical modeling  
527 and machine learning. *Remote Sensing of Environment* 231:110959.
- 528 De Frenne, P., F. Zellweger, F. Rodríguez-Sánchez, B. R. Scheffers, K. Hylander, M. Luoto,  
529 M. Vellend, K. Verheyen, and J. Lenoir. 2019. Global buffering of temperatures under  
530 forest canopies. *Nature Ecology and Evolution* 3:744–749.
- 531 Hartig, F. 2021. DHARMA: residual diagnostics for hierarchical (multi-level/mixed)  
532 regression models. R package version 0.4.1.
- 533 Hernández-Rojas, A. C., J. Kluge, T. Krömer, C. Carvajal-Henández, L. Silva-Mijangos, G.

- 534 Miehe, M. Lehnert, A. Weigand, and M. Kessler. 2020. Latitudinal patterns of species  
535 richness and range size of ferns along elevational gradients at the transition from tropics  
536 to subtropics. *Journal of Biogeography* 47:1383–1397.
- 537 Hodgson, J. G., G. Montserrat-Martí, M. Charles, G. Jones, P. Wilson, B. Shipley, M. Sharafi,  
538 B. E. L. Cerabolini, J. H. C. Cornelissen, et al. 2011. Is leaf dry matter content a better  
539 predictor of soil fertility than specific leaf area? *Annals of Botany* 108:1337–1345.
- 540 Ibanez, F. 1973. Méthode d'analyse spatio-temporelle du processus d'échantillonnage en  
541 planctologie, son influence dans l'interprétation des données par l'analyse en  
542 composantes principales. *Annales de l'Institut océanographique (Paris)* 49:83–111.
- 543 Karst, A. L., and M. J. Lechowicz. 2007. Are correlations among foliar traits in ferns  
544 consistent with those in the seed plants? *New Phytologist* 173:306–312.
- 545 Kessler, M., D. N. Karger, and J. Kluge. 2016. Elevational diversity patterns as an example  
546 for evolutionary and ecological dynamics in ferns and lycophytes. *Journal of*  
547 *Systematics and Evolution* 54:617–625.
- 548 Kessler, M., J. Kluge, A. Hemp, and R. Ohlemüller. 2011. A global comparative analysis of  
549 elevational species richness patterns of ferns. *Global Ecology and Biogeography*  
550 20:868–880.
- 551 Kessler, M., Y. Siorak, M. Wunderlich, and C. Wegner. 2007. Patterns of morphological leaf  
552 traits among pteridophytes along humidity and temperature gradients in the Bolivian  
553 Andes. *Functional Plant Biology* 34:963–971.
- 554 Kluge, J., and M. Kessler. 2007. Morphological characteristics of fern assemblages along an  
555 elevational gradient: patterns and causes. *Ecotropica* 13:27–43.
- 556 Kluge, J., and M. Kessler. 2011. Phylogenetic diversity, trait diversity and niches: species  
557 assembly of ferns along a tropical elevational gradient. *Journal of Biogeography*  
558 38:394–405.

- 559 Komiyama, A., S. Kato, and M. Teranishi. 2001. Differential overstory leaf flushing  
560 contributes to the formation of a patchy understory. *Journal of Forest Research* 6:163–  
561 171.
- 562 Kosman, E., S. M. Scheiner, and H. R. Gregorius. 2021. Severe limitations of the FEve  
563 metric of functional evenness and some alternative metrics. *Ecology and Evolution*  
564 11:123–132.
- 565 Kraft, N. J. B., P. B. Adler, O. Godoy, E. C. James, S. Fuller, and J. M. Levine. 2015.  
566 Community assembly, coexistence and the environmental filtering metaphor. *Functional*  
567 *Ecology* 29:592–599.
- 568 Kraft, N. J. B., R. Valencia, and D. D. Ackerly. 2008. Functional traits and niche-based tree  
569 community assembly in an Amazonian forest. *Science* 322:580–583.
- 570 Lai, I.-L., S.-C. Chang, P.-H. Lin, C.-H. Chou, and J.-T. Wu. 2006. Climatic characteristics  
571 of the subtropical mountainous cloud forest at the Yuanyang lake long-term ecological  
572 research site, Taiwan. *Taiwania* 51:317–329.
- 573 Lavorel, S., and E. Garnier. 2002. Predicting changes in community composition and  
574 ecosystem functioning from plant traits: revisiting the Holy Grail. *Functional Ecology*  
575 16:545–556.
- 576 Li, C. F., M. Chytrý, D. Zelený, M. Y. Chen, T. Y. Chen, C. R. Chiou, Y. J. Hsia, H. Y. Liu,  
577 S. Z. Yang, C. L. Yeh, J. C. Wang, C. F. Yu, Y. J. Lai, W. C. Chao, and C. F. Hsieh.  
578 2013. Classification of Taiwan forest vegetation. *Applied Vegetation Science* 16:698–  
579 719.
- 580 Lin, D., S. Yang, P. Dou, H. Wang, F. Wang, S. Qian, G. Yang, L. Zhao, Y. Yang, and N.  
581 Fanin. 2020. A plant economics spectrum of litter decomposition among coexisting fern  
582 species in a sub-tropical forest. *Annals of Botany* 125:145–155.
- 583 Maes, S. L., M. P. Perring, L. Depauw, M. Bernhardt-Römermann, H. Blondeel, G. Brümelis,



- 584 J. Brunet, G. Decocq, J. den Ouden, et al. 2020. Plant functional trait response to  
585 environmental drivers across European temperate forest understorey communities. *Plant*  
586 *Biology* 22:410–424.
- 587 Majasalmi, T., and M. Rautiainen. 2020. The impact of tree canopy structure on understory  
588 variation in a boreal forest. *Forest Ecology and Management* 466:118100.
- 589 Malavasi, M., V. Bartak, M. L. Carranza, P. Simova, and A. T. R. Acosta. 2018. Landscape  
590 pattern and plant biodiversity in Mediterranean coastal dune ecosystems: Do habitat loss  
591 and fragmentation really matter? *Journal of Biogeography* 45:1367–1377.
- 592 Mantovani, A. 1999. A method to improve leaf succulence quantification. *Brazilian Archives*  
593 *of Biology and Technology* 42:9–14.
- 594 Maréchaux, I., L. Saint-André, M. K. Bartlett, L. Sack, and J. Chave. 2020. Leaf drought  
595 tolerance cannot be inferred from classic leaf traits in a tropical rainforest. *Journal of*  
596 *Ecology* 108:1030–1045.
- 597 McCune, B., and D. Keon. 2002. Equations for potential annual direct incident radiation and  
598 heat load. *Journal of Vegetation Science* 13:603–606.
- 599 Medeiros, C. D., C. Scoffoni, G. P. John, M. K. Bartlett, F. Inman-Narahari, R. Ostertag, S.  
600 Cordell, C. Giardina, and L. Sack. 2019. An extensive suite of functional traits  
601 distinguishes Hawaiian wet and dry forests and enables prediction of species vital rates.  
602 *Functional Ecology* 33:712–734.
- 603 Mokany, K., and S. H. Roxburgh. 2010. The importance of spatial scale for trait-abundance  
604 relations. *Oikos* 119:1504–1514.
- 605 Nygaard, B., and R. Ejrnæs. 2004. A new approach to functional interpretation of vegetation  
606 data. *Journal of Vegetation Science* 15:49–56.
- 607 Oksanen, A. J., F. G. Blanchet, M. Friendly, R. Kindt, P. Legendre, D. McGlenn, P. R.  
608 Minchin, R. B. O. Hara, G. L. Simpson, et al. 2017. *vegan: community ecology package*.

- 609 R package version 2.4-2.
- 610 Ordoñez, J. C., P. M. van Bodegom, J.-P. M. Witte, I. J. Wright, P. B. Reich, and R. Aerts.  
611 2009. A global study of relationships between leaf traits, climate and soil measures of  
612 nutrient fertility. *Global Ecology and Biogeography* 18:137–149.
- 613 Pérez-Harguindeguy, N., S. Diaz, E. Garnier, S. Lavorel, H. Poorter, P. Jaureguiberry, M. S.  
614 Bret-Harte, W. K. Cornwell, J. M. Craine, et al. 2013. New handbook for standardised  
615 measurement of plant functional traits worldwide. *Australian Journal of Botany* 61:167–  
616 234.
- 617 Qian, H., and R. E. Ricklefs. 2016. Out of the tropical lowlands: latitude versus elevation.  
618 *Trends in Ecology and Evolution* 31:738–741.
- 619 Read, J., G. D. Sanson, M. de Garine-Wichatitsky, and T. Jaffré. 2006. Sclerophylly in two  
620 contrasting tropical environments: low nutrients vs. low rainfall. *American Journal of*  
621 *Botany* 93:1601–1614.
- 622 Reinhardt, K., and W. K. Smith. 2008. Impacts of cloud immersion on microclimate,  
623 photosynthesis and water relations of *Abies fraseri* ( Pursh.) Poiret in a temperate  
624 mountain cloud forest. *Oecologia* 158:229–238.
- 625 Rogers, D. A., T. P. Rooney, D. Olson, and D. M. Waller. 2008. Shifts in Southern  
626 Wisconsin forest canopy and understory richness, composition, and heterogeneity.  
627 *Ecology* 89:2482–2492.
- 628 Ruokolainen, K., H. Tuomisto, M. J. Macía, M. A. Higgins, and M. Yli-halla. 2007. Are  
629 floristic and edaphic patterns in Amazonian rain forests congruent for trees,  
630 pteridophytes and Melastomataceae? *Journal of Tropical Ecology* 23:13–25.
- 631 Salazar, L., J. Homeier, C. Leuschner, M. Kessler, and J. Kluge. 2012. Altitudinal change in  
632 biomass, productivity and leaf functional traits in the Ecuadorian Andes: Comparing  
633 terrestrial ferns with trees. Pages 89–111 *Unraveling the causal links between ecosystem*

- 634 productivity measures and species richness using terrestrial ferns in Ecuador. PhD thesis.
- 635 Scheiner, S. M. 2019. A compilation of and typology for abundance-, phylogenetic- and  
636 functional-based diversity metrics. bioRxiv:1–29.
- 637 Scheiner, S. M., E. Kosman, S. J. Presley, and M. R. Willig. 2017. Decomposing functional  
638 diversity. *Methods in Ecology and Evolution* 8:809–820.
- 639 Schulz, H. M., C.-F. Li, B. Thies, S.-C. Chang, and J. Bendix. 2017. Mapping the montane  
640 cloud forest of Taiwan using 12 year MODIS-derived ground fog frequency data. *PLOS*  
641 *ONE* 12:e0172663.
- 642 Sessa, E. B., S. M. Chambers, D. Li, L. Trotta, L. Endara, J. G. Burleigh, and B. Baiser. 2018.  
643 Community assembly of the ferns of Florida. *American Journal of Botany* 105:549–564.
- 644 Sessa, E. B., and T. J. Givnish. 2014. Leaf form and photosynthetic physiology of *Dryopteris*  
645 species distributed along light gradients in eastern North America. *Functional Ecology*  
646 28:108–123.
- 647 Šímová, I., C. Violle, J.-C. Svenning, J. Kattge, K. Engemann, B. Sandel, R. K. Peet, S. K.  
648 Wisser, B. Blonder, et al. 2018. Spatial patterns and climate relationships of major plant  
649 traits in the New World differ between woody and herbaceous species. *Journal of*  
650 *Biogeography* 45:895–916.
- 651 Šmilauer, P., and J. Lepš. 2014. *Multivariate Analysis of Ecological Data using CANOCO 5*.  
652 Cambridge University Press, Cambridge.
- 653 Tanaka, T., and T. Sato. 2015. Taxonomic, phylogenetic and functional diversities of ferns  
654 and lycophytes along an elevational gradient depend on taxonomic scales. *Plant Ecology*  
655 216:1597–1609.
- 656 Tuomisto, H., G. Zuquim, and G. Cárdenas. 2014. Species richness and diversity along  
657 edaphic and climatic gradients in Amazonia. *Ecography* 37:1034–1046.
- 658 Wang, H., M. Zhang, and H. Nan. 2019. Abiotic and biotic drivers of species diversity in

- 659 understory layers of cold temperate coniferous forests in North China. *Journal of*  
660 *Forestry Research* 30:2213–2225.
- 661 Weigand, A., S. Abrahamczyk, I. Aubin, C. Bitá-Nicolae, H. Bruelheide, C. I. Carvajal-  
662 Hernández, D. Cicuzza, L. E. Nascimento da Costa, J. Csiky, et al. 2020. Global fern  
663 and lycophyte richness explained: How regional and local factors shape plot richness.  
664 *Journal of Biogeography* 47:59–71.
- 665 Weiher, E., and P. A. Keddy. 1995. Assembly rules, null models, and trait dispersion: new  
666 questions from old patterns. *Oikos* 74:159–164.
- 667 Wilson, P. J., K. Thompson, and J. G. Hodgson. 1999. Specific leaf area and leaf dry matter  
668 content as alternative predictors of plant strategies. *New Phytologist* 143:155–162.
- 669 Wright, I. J., and K. Cannon. 2001. Relationships between leaf lifespan and structural  
670 defences in a low-nutrient, sclerophyll flora. *Functional Ecology* 15:351–359.
- 671 Wright, I. J., P. B. Reich, J. H. C. Cornelissen, D. S. Falster, P. K. Groom, K. Hikosaka, W.  
672 Lee, C. H. Lusk, Ü. Niinemets, J. Oleksyn, N. Osada, H. Poorter, D. I. Warton, and M.  
673 Westoby. 2005. Modulation of leaf economic traits and trait relationships by climate.  
674 *Global Ecology and Biogeography* 14:411–421.
- 675 Wright, I. J., P. B. Reich, M. Westoby, D. D. Ackerly, Z. Baruch, F. Bongers, J. Cavender-  
676 Bares, T. Chapin, J. H. C. Cornelissen, et al. 2004. The worldwide leaf economics  
677 spectrum. *Nature* 428:821–827.
- 678 Zelený, D. 2018. Which results of the standard test for community-weighted mean approach  
679 are too optimistic? *Journal of Vegetation Science* 29:953–966.
- 680 Zhang, H., S. Zhu, R. John, R. Li, H. Liu, and Q. Ye. 2017. Habitat filtering and exclusion of  
681 weak competitors jointly explain fern species assemblage along a light and water  
682 gradient. *Scientific Reports* 7:298.
- 683 Zhang, S.-B., M. Sun, K.-F. Cao, H. Hu, and J.-L. Zhang. 2014. Leaf photosynthetic rate of

684 tropical ferns is evolutionarily linked to water transport capacity. PLOS ONE 9:e84682.

685 Zhu, S.-D., R.-H. Li, J. Song, P.-C. He, H. Liu, F. Berninger, and Q. Ye. 2016. Different leaf

686 cost–benefit strategies of ferns distributed in contrasting light habitats of sub-tropical

687 forests. *Annals of Botany* 117:497–506.

688

689 **Tables**

690 **Table 1. Parameter estimates of the reduced redundancy analyses (RDA) for species**  
 691 **and trait composition and the reduced generalized linear models for species richness (S),**  
 692 **functional divergence (M') and functional equability (<sup>1</sup>E(T)), for the overstory and**  
 693 **understory datasets separately.** Test statistic (F) for each retained predictor and full model  
 694 adjusted R<sup>2</sup> provided. For soil principal components 'soil NPK', 'soil pH' and 'soil Cu', see  
 695 Table 1. <sup>(\*)</sup>0.10 ≥ p-value > 0.05; \* 0.05 ≥ p-value > 0.01; \*\* 0.01 ≥ p-value > 0.001; \*\*\* 0.001 ≥  
 696 p-value. <sup>sqrt</sup> = square root transformation, <sup>sq</sup> = squared transformation of environmental factor.  
 697 El = elevation, fog = ground fog frequency.

698

|                      | climate proxies                                                 |                                                                 |                         | soil               |                    |                     |                    |                                | R <sup>2</sup> |
|----------------------|-----------------------------------------------------------------|-----------------------------------------------------------------|-------------------------|--------------------|--------------------|---------------------|--------------------|--------------------------------|----------------|
|                      | elevation                                                       | fog                                                             | heat load <sup>sq</sup> | soil depth         | soil NPK           | soil pH             | soil Cu            | soil rockiness <sup>sqrt</sup> |                |
| <b>overstory</b>     |                                                                 |                                                                 |                         |                    |                    |                     |                    |                                |                |
| species composition  | 10.4 <sup>***</sup>                                             | 4.7 <sup>***</sup>                                              | 1.6 <sup>(*)</sup>      | -                  | 1.7 <sup>*</sup>   | 3.2 <sup>***</sup>  | 1.6 <sup>(*)</sup> | -                              | 29.2           |
| CM trait composition | 10.0 <sup>***</sup>                                             | 4.2 <sup>**</sup>                                               | -                       | -                  | 4.6 <sup>**</sup>  | 13.3 <sup>***</sup> | 7.7 <sup>***</sup> | -                              | 49.3           |
| S                    | 18.1 <sup>***</sup>                                             | 3.1 <sup>(*)</sup>                                              | 10.0 <sup>**</sup>      | -                  | -                  | -                   | -                  | -                              | 36.5           |
| M'                   | 97.5 <sup>***</sup>                                             | -                                                               | 2.5                     | -                  | -                  | -                   | -                  | -                              | 64.2           |
| <sup>1</sup> E(T)    | 5.3 <sup>*</sup>                                                | fog: 12.1 <sup>**</sup><br>fog <sup>2</sup> : 9.2 <sup>**</sup> | 5.0 <sup>*</sup>        | -                  | 3.6 <sup>(*)</sup> | -                   | -                  | -                              | 48.5           |
| <b>understory</b>    |                                                                 |                                                                 |                         |                    |                    |                     |                    |                                |                |
| species composition  | 10.4 <sup>***</sup>                                             | 7.3 <sup>***</sup>                                              | 1.9 <sup>*</sup>        | -                  | -                  | 3.9 <sup>***</sup>  | -                  | -                              | 29.8           |
| CM trait composition | 21.0 <sup>***</sup>                                             | 5.4 <sup>***</sup>                                              | -                       | -                  | -                  | 3.9 <sup>**</sup>   | 7.2 <sup>***</sup> | -                              | 42.2           |
| S                    | el: 11.4 <sup>**</sup><br>el <sup>2</sup> : 69.7 <sup>***</sup> | -                                                               | -                       | -                  | 5.1 <sup>*</sup>   | 6.4 <sup>*sq</sup>  | -                  | 4.3 <sup>*</sup>               | 65.7           |
| M'                   | 14.4 <sup>***</sup>                                             | 4.0 <sup>(*)</sup>                                              | -                       | -                  | -                  | -                   | -                  | -                              | 31.7           |
| <sup>1</sup> E(T)    | 8.2 <sup>**</sup>                                               | -                                                               | 7.5 <sup>**</sup>       | 3.2 <sup>(*)</sup> | -                  | 9.8 <sup>**</sup>   | 4.6 <sup>*</sup>   | -                              | 46.5           |

699

700 **Figure legends**

701 **Figure 1. Location of the six elevation zones at which vegetation plots were established**  
702 **in northern Taiwan.**

703

704 **Figure 2. Venn diagrams visualizing the variation partitioning between climate proxy**  
705 **and soil variable effects on A. the overstory plot × species matrix, B. the understory plot**  
706 **× species matrix, C. the overstory plot × community mean (CM) trait matrix, D. the**  
707 **understory plot × CM trait matrix, using redundancy analysis (RDA).** Numbers in the  
708 Venn diagrams correspond to the relative proportions of the total explained variation. The  
709 total explained variance (adjusted  $R^2$ ) is also presented.

710

711 **Figure 3. Triplots for the redundancy analyses (RDA) after forward model selection,**  
712 **exploring the effect of environment (climate proxies and soil) on A. the overstory plot ×**  
713 **species matrix, B. the understory plot × species matrix, C. the overstory plot ×**  
714 **community mean (CM) trait matrix, D. the understory plot × CM trait matrix.** Plots  
715 visualized as points, with colors indicating plot elevation, 40% most common species with  
716 20% best fit to the RDA axes are visualized as codes (see Appendix S3), CM trait vectors  
717 visualized as vector tips with names in italics, environmental variables visualized as vectors.  
718 Note that ‘soil NPK’, ‘soil pH’ and ‘soil Cu’ refer to the first three soil PCA axes,  
719 respectively (Table 1). Chl = leaf chlorophyll content,  $\delta^{13}\text{C}$  = the leaf  $^{13}\text{C}/^{12}\text{C}$  stable isotope  
720 ratio,  $\delta^{15}\text{N}$  = the leaf  $^{15}\text{N}/^{14}\text{N}$  stable isotope ratio, EWT = equivalent water thickness, Lth =  
721 leaf thickness.

722

723 **Figure 4. Scatterplots for pairwise regressions between plot-level overstory and**  
724 **understory community mean (CM) trait values.** Solid regression line + SE presented for

725 significant regressions, dashed line for marginally significant regression (see Appendix S6).  
726 Each datapoint corresponds to one vegetation plot, with colors indicating plot elevation.  $\delta^{13}\text{C}$   
727 = the leaf  $^{13}\text{C}/^{12}\text{C}$  stable isotope ratio,  $\delta^{15}\text{N}$  = the leaf  $^{15}\text{N}/^{14}\text{N}$  stable isotope ratio, EWT =  
728 equivalent water thickness, Lth = leaf thickness.

729

730 **Figure 5. Scatterplots between three species and functional diversity measures, on the**  
731 **one hand and elevation and the second soil PCA axis (soil pH), on the other hand. Blue**  
732 **circles and lines = overstory species, green triangles and lines = understory species. Solid**  
733 **regression line + SE presented for significant regressions (Table 1).**



734 **Figures**

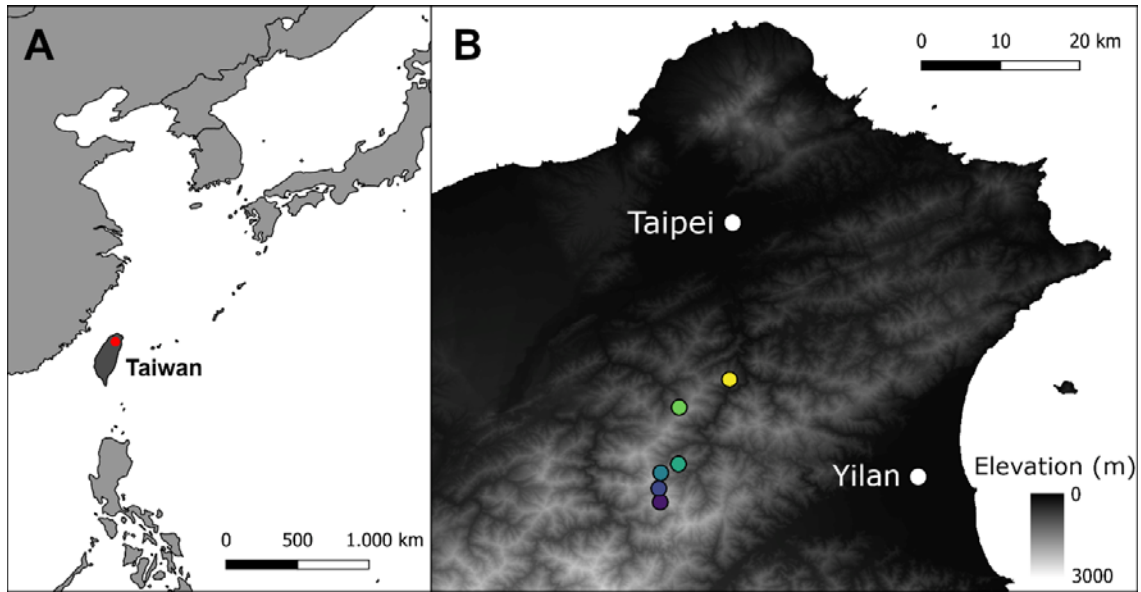

735

736 **Figure 1.**

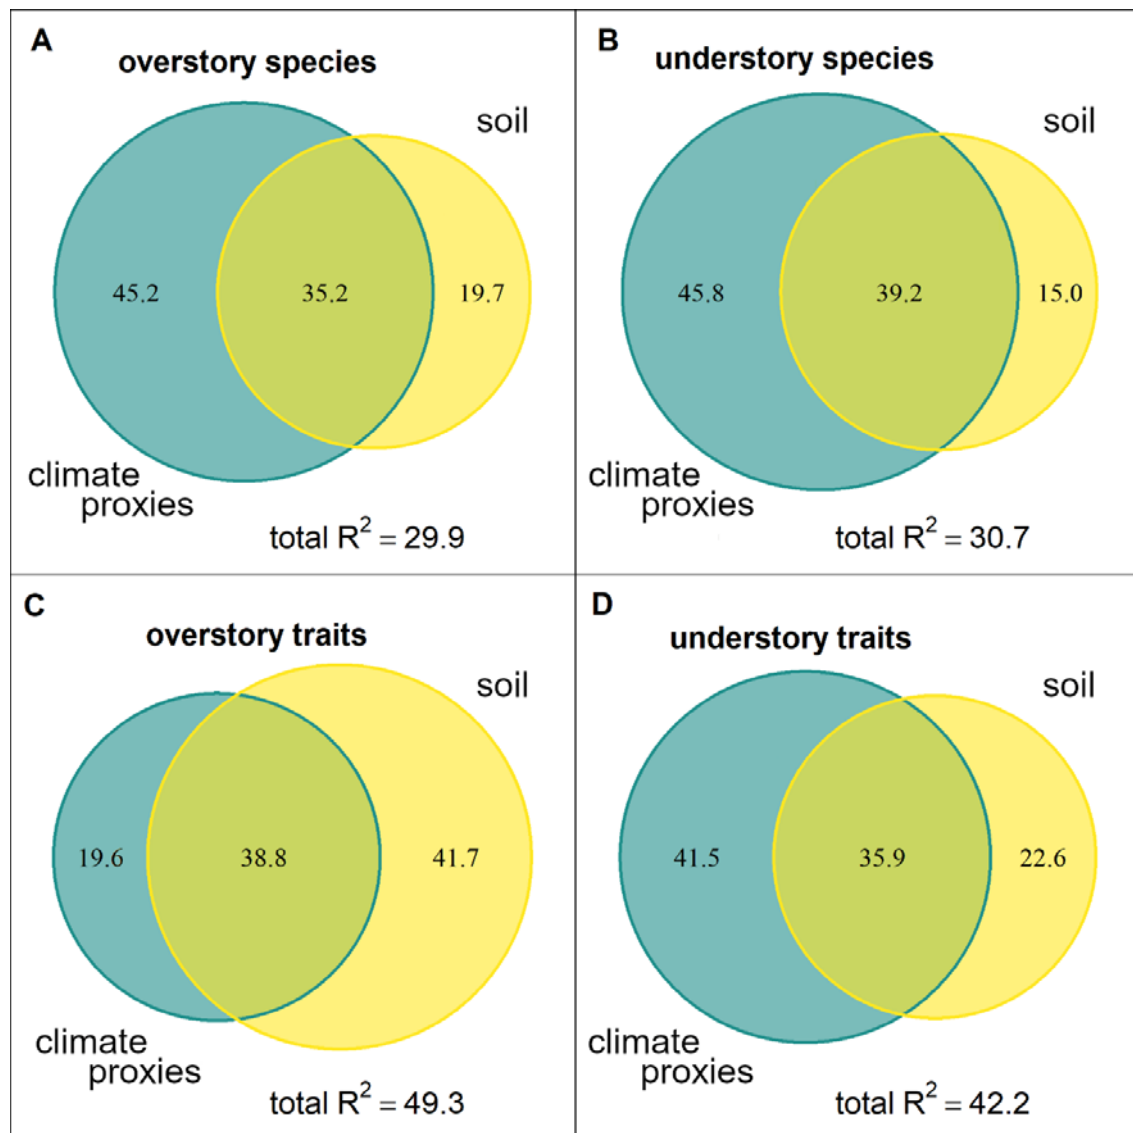

737

738 **Figure 2.**



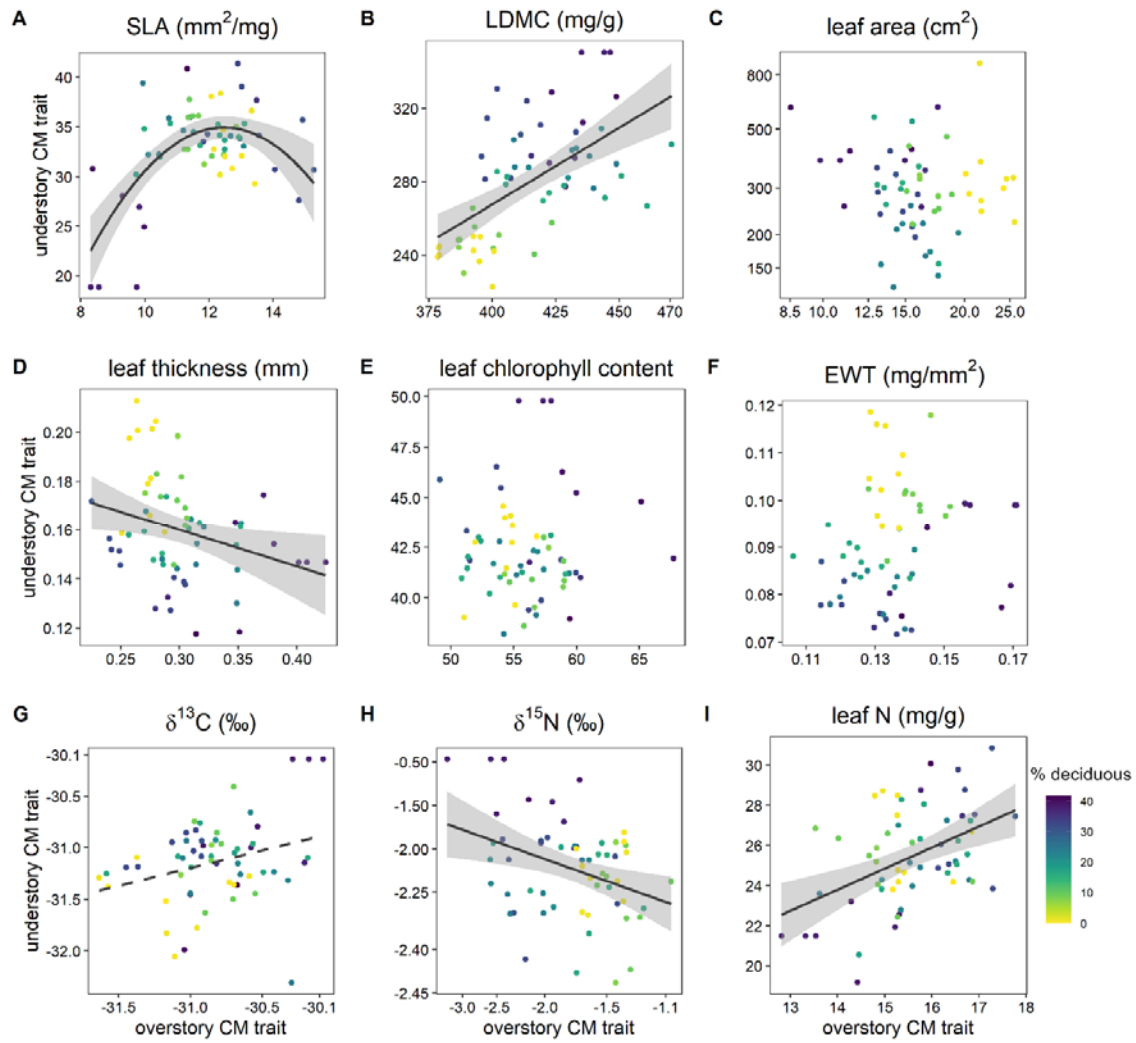

741

742 **Figure 4.**

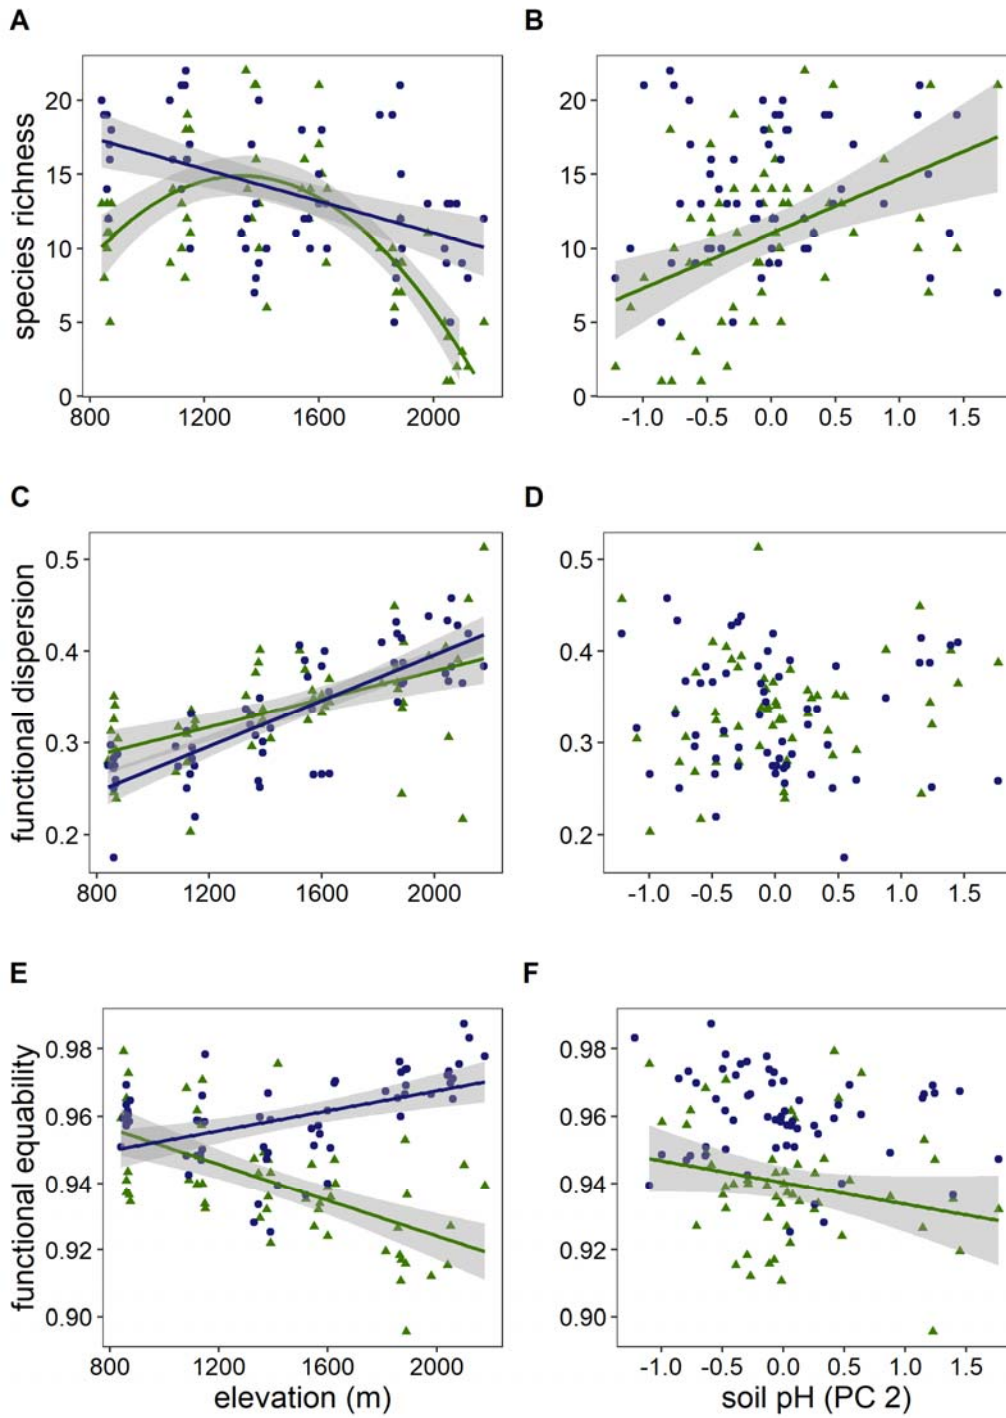

743

744 **Figure 5.**
